# Supplementary material
Source: MDPI journal article supplement (https://www.mdpi.com/2073-445X/12/4/826)
Supplement: s1 [file s1 › land-2282755-supplementary.pdf]

## Supplementary Material

**Figure S1.** Spatial distribution of sustainable pillars of agritourism

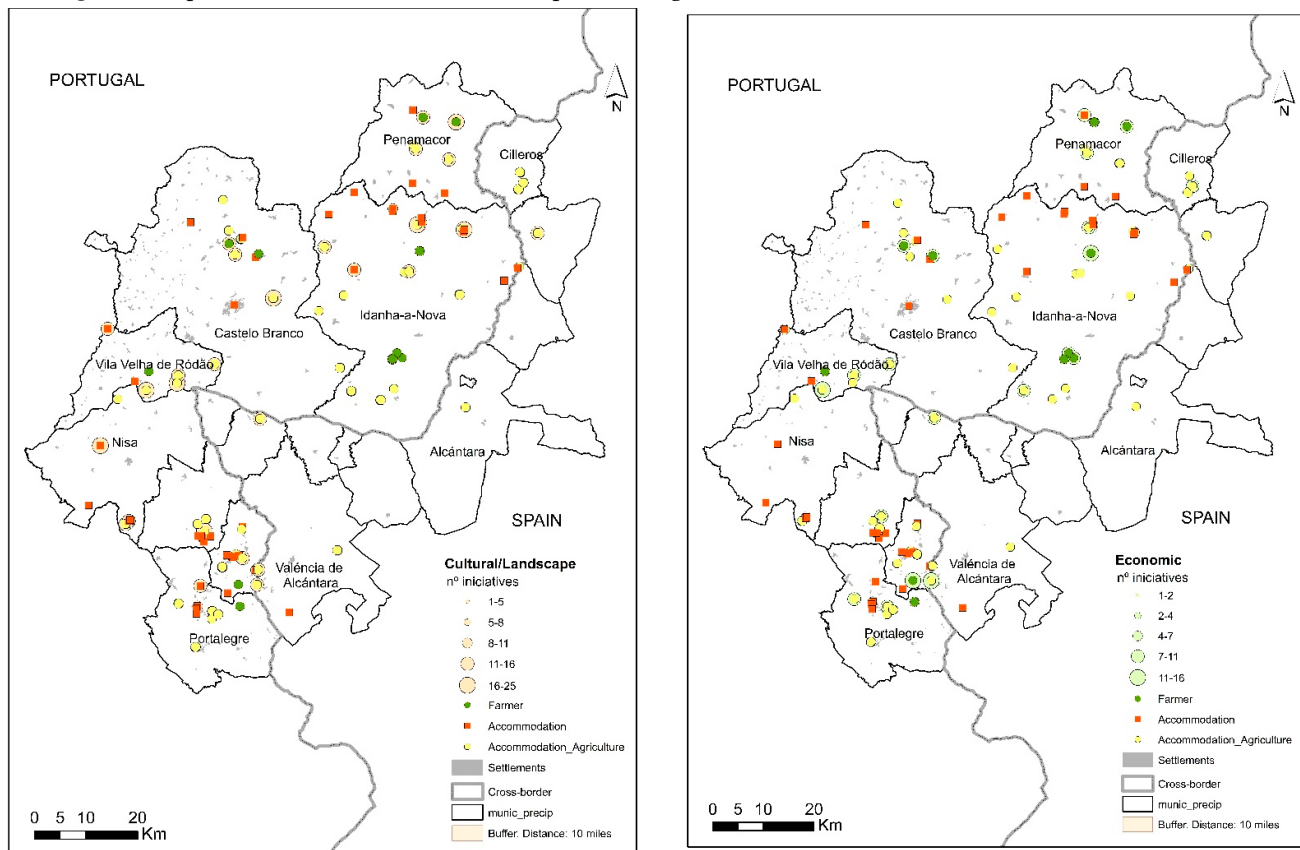

a) Cultural/landscape sustainability indicator.

b) Economic sustainability indicator.

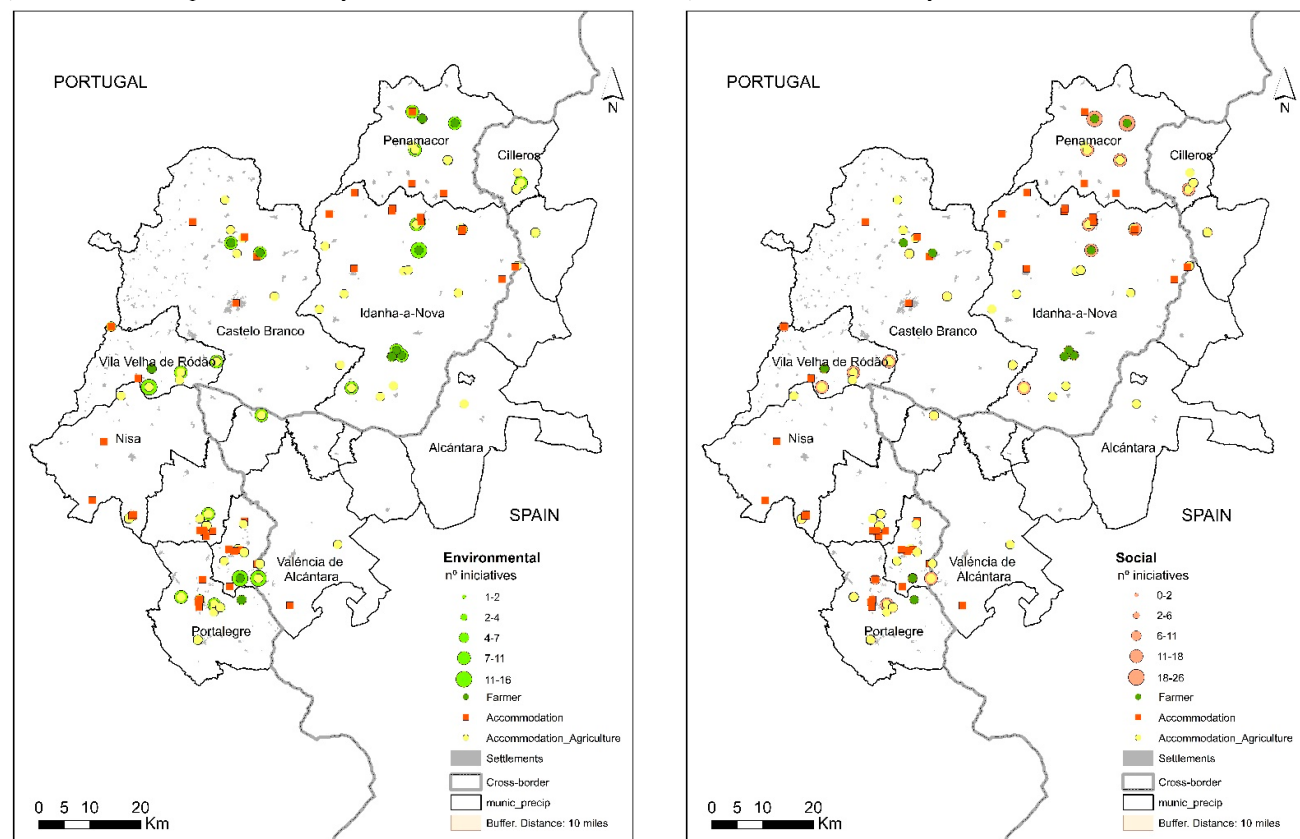

c) Environmental sustainability indicator.

d) Social sustainability indicator.

Source: Own material from calculations carried out with ArcGis 10.8

Figure S2. Hot Spot analysis

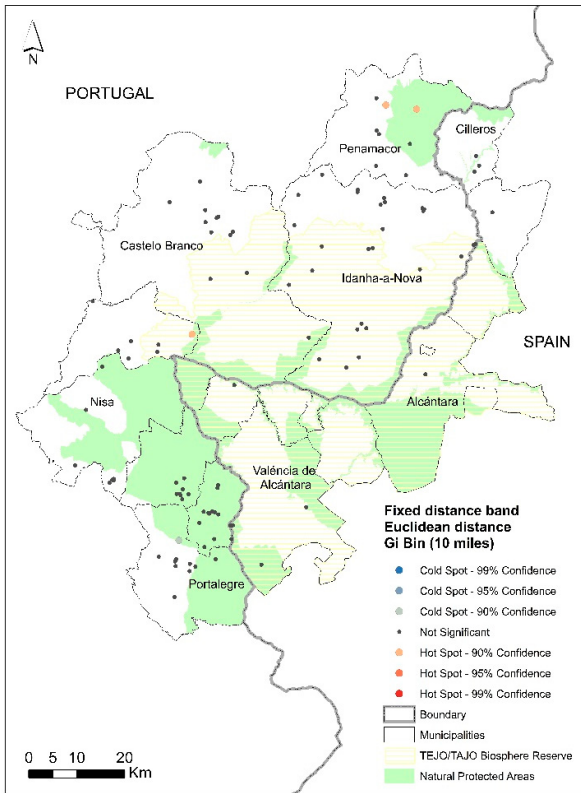

a) Cultural/landscape sustainability indicator.

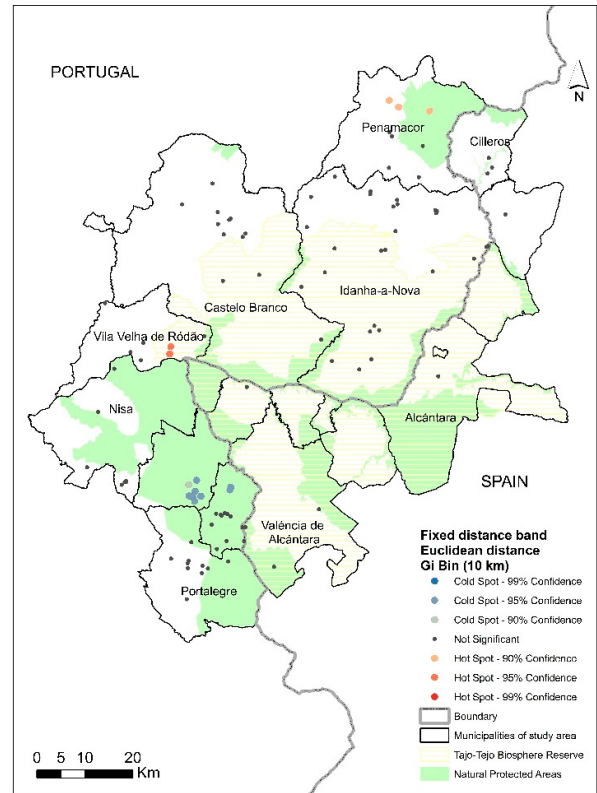

b) Economic sustainability indicator.

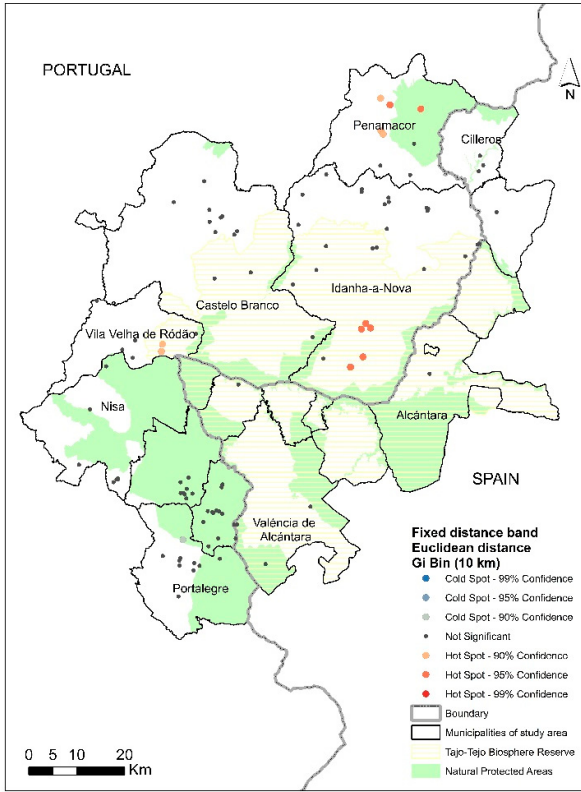

c) Environmental sustainability indicator.

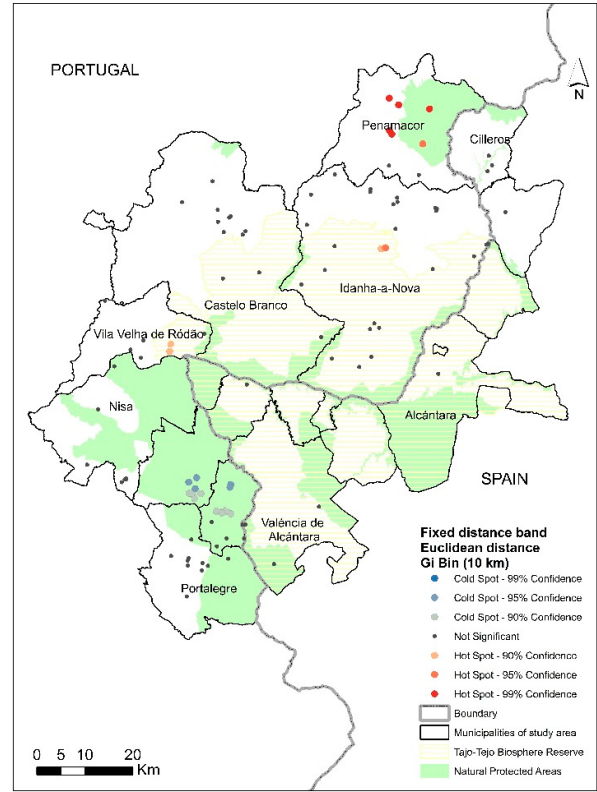

d) Social sustainability indicator.

Source: Own material from calculations carried out with ArcGIS 10.8

**Figure S3. LISA analysis**

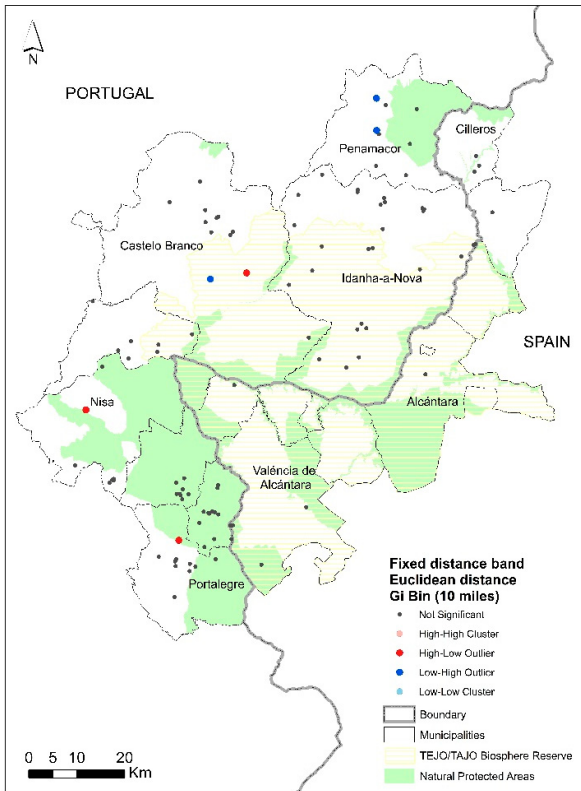

a) Cultural/landscape sustainability indicator.

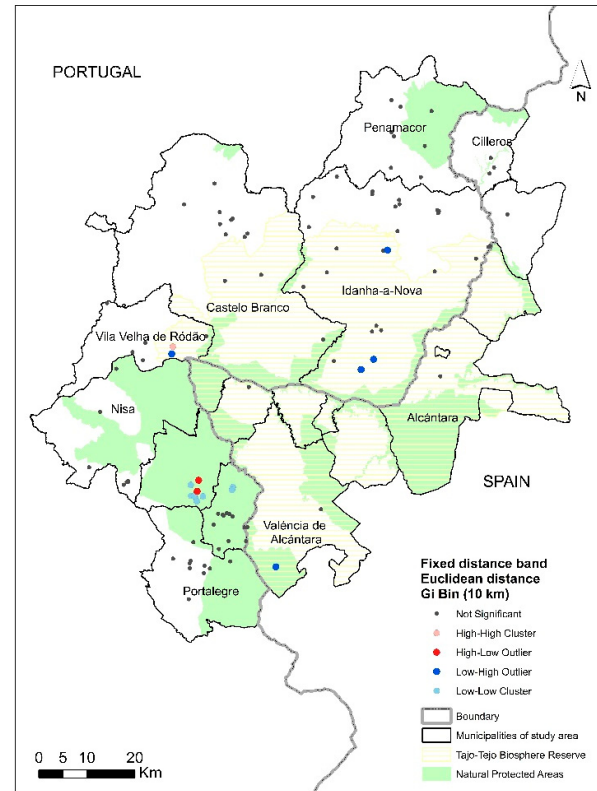

b) Economic sustainability indicator.

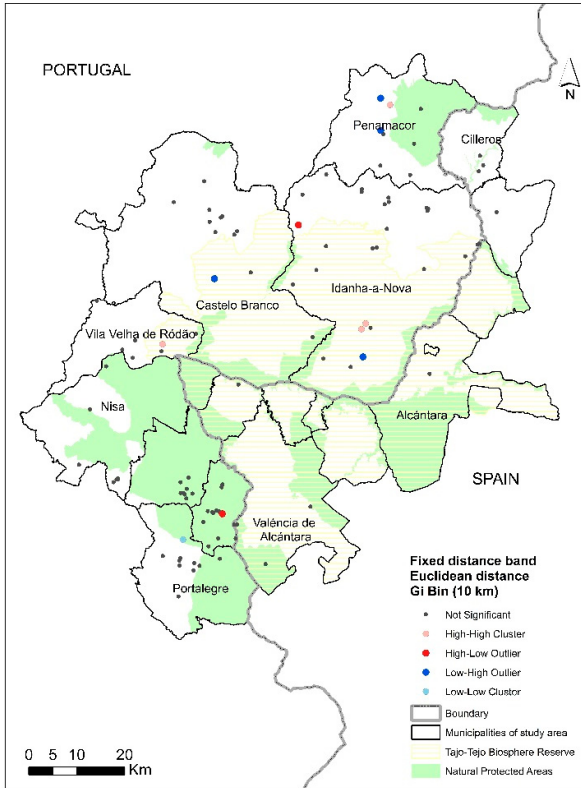

c) Environmental sustainability indicator.

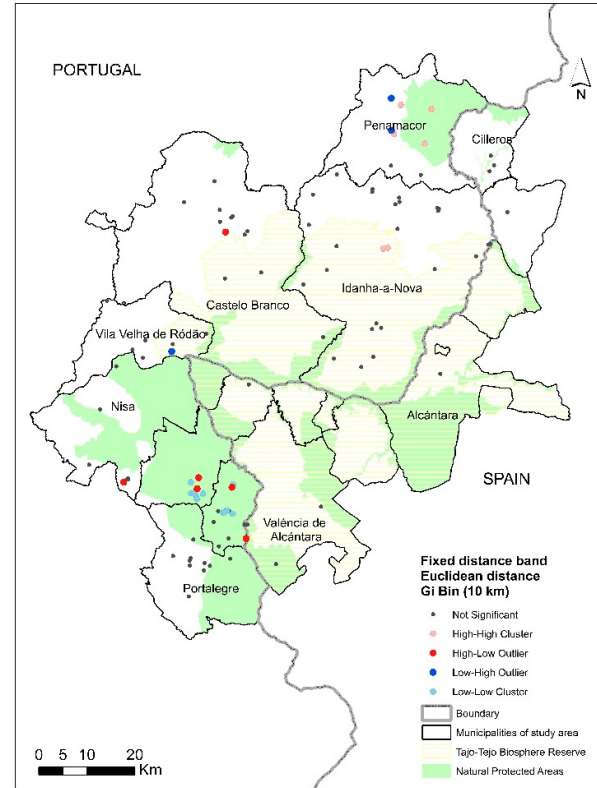

d) Social sustainability indicator.

Source: Own material from calculations carried out with ArcGIS 10.8
